1 **Azithromycin resistance through interspecific acquisition of an epistasis dependent efflux**  
2 **pump component and transcriptional regulator in *Neisseria gonorrhoeae***

3

4 Crista B. Wadsworth<sup>a\*</sup>, Brian J. Arnold<sup>a,b</sup>, Mohamad R. Abdul Sater<sup>a</sup>, and Yonatan H. Grad<sup>a,c,\*</sup>

5

6 <sup>a</sup>Department of Immunology and Infectious Diseases, Harvard T.H. Chan School of Public

7 Health, Boston, MA 02115

8 <sup>b</sup>Department of Epidemiology, Harvard T.H. Chan School of Public Health, Boston, MA 02115

9 <sup>c</sup>Division of Infectious Diseases, Brigham and Women's Hospital, Harvard Medical School,

10 Boston, MA 02115

11

12

13 \*Corresponding Authors:

14 Crista Wadsworth (cwadsworth@hsph.harvard.edu), Yonatan Grad (ygrad@hsph.harvard.edu)

15

16 **Keywords:** *Neisseria gonorrhoeae*, gonorrhea, antibiotic resistance, macrolide, efflux pump,

17 epistasis

18 **ABSTRACT**

19 Mosaic interspecifically acquired alleles of the multiple transferable resistance (*mtr*)  
20 efflux pump operon correlate with reduced susceptibility to azithromycin in *Neisseria*  
21 *gonorrhoeae* in epidemiological studies. However, whether and how these alleles cause resistance  
22 is unclear. Here, we use population genomics, transformations, and transcriptional analyses to  
23 dissect the relationship between variant *mtr* alleles and azithromycin resistance. We find that the  
24 locus encompassing the *mtrR* transcriptional repressor and the *mtrCDE* pump is a hotspot of  
25 interspecific recombination introducing alleles from *N. meningitidis* and *N. lactamica* into *N.*  
26 *gonorrhoeae*, with multiple rare haplotypes in linkage disequilibrium at *mtrD* and the *mtr*  
27 promoter region. Transformations demonstrated that resistance is mediated through epistasis  
28 between these two loci and that the full length of the mosaic *mtrD* allele is required. Gene  
29 expression profiling revealed the mechanism of resistance in mosaics couples the novel *mtrD*  
30 alleles with promoter mutations enhancing expression of the pump. Overall, our results  
31 demonstrate that epistatic interactions at *mtr* gained from multiple *Neisseria* has contributed to  
32 azithromycin resistance in the gonococcal population.

33

34 **AUTHOR SUMMARY**

35 *Neisseria gonorrhoeae* is the sexually transmitted bacterial pathogen responsible for  
36 over 100 million cases of gonorrhea worldwide each year. The incidence of reduced susceptibility  
37 to the macrolide class antibiotic azithromycin has increased in the past decade; however, a large  
38 proportion of the genetic basis of resistance to this drug remains unexplained. Recently,  
39 resistance has been shown to be highly associated with mosaic alleles of the multiple transferable  
40 resistance (*mtr*) efflux pump, which have been gained via horizontal gene exchange with other  
41 *Neisseria*. However, if and how these alleles caused resistance was unknown. Here, we  
42 demonstrate that resistance has been gained through epistasis between *mtrD* and the *mtr* promoter  
43 region using evidence from both population genomics and experimental genetic manipulation.

44 Epistasis also acts within the *mtrD* locus alone, requiring the full length of the gene for  
45 phenotypic resistance. Transcriptomic profiling indicates that the mechanism of resistance in  
46 mosaics is likely derived from both structural changes to *mtrD*, coupled with promoter mutations  
47 that result in regulatory changes to *mtrCDE*.

48

## 49 INTRODUCTION

50 The causal agent of gonorrhea, *Neisseria gonorrhoeae*, is a gram-negative diplococcus  
51 and an exclusively human pathogen. The prevalence of *N. gonorrhoeae* with reduced  
52 susceptibility to azithromycin has dramatically increased in recent years from just 0.6% in 2013  
53 to 3.6% in 2016 in the United States [1], 0.8% in 2013 to 4.7% in 2016 in England and Wales [2],  
54 and 5.4% in 2013 to 7.1% in 2015 across Europe [3]. Additionally, reports in 2015 from both  
55 China and Japan have documented resistance in as high as 30% of the gonococcal population in  
56 some regions [4]. This spike in resistance is alarming, as azithromycin is one of the two first line  
57 drugs recommended as dual antimicrobial therapy for uncomplicated cases of gonococcal  
58 urethritis by the Centers for Disease Control (CDC). Azithromycin is a macrolide antibiotic that  
59 inhibits protein synthesis by binding to the 23s rRNA component of the 50S ribosome, and while  
60 the majority of resistance can be explained by mutations in the 23s rRNA azithromycin binding  
61 sites (i.e., C2611T and A2059G) [5-7] the genetic basis of ~36% of resistance is still unexplained  
62 within the U.S. population [7], thus limiting the potential for development of molecular-based  
63 resistance diagnostics and restricting our understanding of the evolutionary paths to reduced drug  
64 susceptibility.

65 Gonococci are adept at acquiring antimicrobial resistance as a result of their natural  
66 competence for transformation, allowing for the spread of resistance and other adaptively  
67 advantageous alleles, between lineages and even across species boundaries [8-11]. Extensive  
68 intragenus gene exchange has led to the concept of *Neisseria* as a consortium of species  
69 interconnected by allele sharing, with ‘fuzzy’ borders permitting rapid access to new adaptive

70 solutions [11,12]. In gonococci, intragenus recombination is an important source of novel genetic  
71 variation with many observations of ‘mosaic’ loci gained from other neisserial species [13-16].  
72 However, aside from horizontal gene transfer facilitating the evolution of resistance to third-  
73 generation cephalosporins through acquisition of mosaic *penA* [7,14], allelic exchange has not yet  
74 been proven to be the basis for resistance to any other antibiotic class in this species.

75         Recent epidemiological studies from the Unites States, Canada, and Australia have  
76 reported an association between mosaic *multiple transferable resistance (mtr)* efflux pump alleles  
77 and reduced susceptibility to azithromycin [7,17-19]. *Mtr* mosaics appear to have originated  
78 through horizontal gene exchange from other *Neisseria*, and have been identified by high  
79 sequence homology of the repressor of the pump (*mtrR*) to *N. meningitidis* and *N. lactamica*.  
80 Mosaics have previously been associated with an outbreak of azithromycin resistance in Kansas  
81 City, MO from 1999-2000 [20,21], and also the majority of azithromycin resistance reported in  
82 New South Wales, Australia [19]. While correlation between mosaic *mtr* and azithromycin  
83 resistance suggests causality, there is little experimental evidence to confirm the association.

84         The Mtr efflux pump is comprised of the MtrC-MtrD-MtrE cell envelope proteins, which  
85 together export diverse hydrophobic antimicrobial agents such as such as antibiotics, nonionic  
86 detergents, antibacterial peptides, bile salts, and gonadal steroidal hormones from the cell [22-26].  
87 Mtr-mediated resistance to diverse antimicrobial agents in gonococcus is thought to act via  
88 enhanced drug export as a result of overexpression of *mtrCDE*. Mutations that alter expression of  
89 the pump include the *mtrC*<sub>120</sub> substitution, an adenine to guanine transition located 120 bp  
90 upstream of the *mtrC* start codon which acts as an alternative promoter for *mtrCDE* [27,28]; an  
91 A-deletion in the *mtrCDE* promoter that has been shown to repress the transcription of *mtrR*  
92 while simultaneously enhancing transcription of *mtrCDE* [29]; and mutations that abrogate the  
93 function of MtrR by inducing premature stop codons or radical amino acid substitutions in the  
94 DNA-binding motif [20,30,31]. However, it is unclear if resistance in *mtr* mosaics is derived  
95 from any of these mechanisms.

96           Here, we used a combination of population genomic and experimental approaches to  
97 dissect the mechanism of resistance in mosaics. We first assessed patterns of allelic diversity  
98 within the gonococcal population to define the boundaries of horizontal gene transfer at  
99 *mtrRCDE*, and found that the entire *mtr* region is a hotspot of interspecies recombination which  
100 has introduced multiple rare and divergent mosaic alleles from *N. meningitidis* and *N. lactamica*  
101 into the gonococcal population. Strong linkage disequilibrium at *mtrD* and the *mtr* promoter  
102 region suggested the maintenance of epistatic allelic combinations, thus we tested for interaction  
103 effects within and between *mtr* loci via transformation. We discovered epistatic interactions  
104 across almost the entirety of *mtrD*, and also between mosaic *mtrD* and mosaic *mtr* promoter  
105 regions, that synergistically enhanced azithromycin resistance. Furthermore, patterns of diversity  
106 in this region coupled with experimental evidence suggest antibiotic-mediated selection may be  
107 acting on these epistatic interactions. Finally, we tested for regulatory evolution of pump  
108 components, as previous mechanisms of azithromycin resistance through the Mtr efflux pump  
109 have been demonstrated to be expression-driven. Our results support that inheritance of mosaic  
110 promoter regions increases the expression of *mtrCDE* while gaining mosaic *mtrD* alone does not.  
111 Thus, the likely mechanism of resistance in mosaics is a structural change to *mtrD*, which  
112 enhances the capacity of the protein to recognize or transport azithromycin, coupled with  
113 increased efflux through the amplified production of pump components.

114

## 115 **RESULTS**

### 116 **Allelic diversity suggests increased interspecies admixture at *mtrRCDE***

117           To gain insight into the evolutionary history of the *mtrR* transcriptional repressor and the  
118 *mtrCDE* pump, we analyzed patterns of diversity using the 1102 Gonococcal Isolate Surveillance  
119 Project (GISP) isolates described in Grad et al. [7,32]. A significant increase in allelic diversity  
120 was observed across *mtrRCDE* compared to the entire genome, with the highest diversity at *mtrD*  
121 (Figure 1a,b; Supplementary Table 1). We also detected a significant enrichment of rare alleles in

122 the population across *mtrRCDE* (Figure 1a,c; Supplementary Table 1). Linkage disequilibrium  
123 was strongest at *mtrD* and the *mtr* promoter region in a comparison of all pairs of single  
124 nucleotide polymorphisms (SNPs) within *mtrRCDE*, with higher linkage observed at pairs of  
125 variant sites within each of these loci (Figure 1d,f; Supplementary Table 1).

126 To define interspecific admixture events within *Neisseria*, we characterized the  
127 genealogical sorting index (*gsi*; [33]) to explore gene tree topology measures of species-specific  
128 phylogenetic exclusivity. *gsi* ranges from 0 (no exclusivity) to 1 (monophyletic), and serves as a  
129 metric to assess allele sharing that may arise through interspecific recombination or incomplete  
130 divergence from a recent split between species. We calculated *gsi* for genes in a 50 kb window  
131 encompassing *mtrRCDE* with conserved microsynteny between *N. gonorrhoeae* and other  
132 *Neisseria* (Supplementary Figure 1). This region included 29 core genes excluding *mtrRCDE*. To  
133 define the region-specific *gsi* background, we calculated *gsi* values across 100 bootstrap  
134 replicates for each gene in the *mtrRCDE* flanking region by species. Mean gonococcal *gsi* was  
135 0.95 with *N. meningitidis*, 0.99 with *N. lactamica*, and 0.92 with *N. polysaccharea* for flanking  
136 genes (Figure 1e; Supplementary Table 2). Significant reductions in *gsi* were detected across  
137 *mtrRCDE* compared to the 29 loci within the surrounding 50 kb region (Figure 1e). Significant  
138 allele sharing between *N. gonorrhoeae* and *N. meningitidis* was exclusively observed at *mtrR*  
139 (Figure 1e; Supplementary Table 2), while significant allele sharing between *N. gonorrhoeae* and  
140 both *N. lactamica* and *N. polysaccharea* occurred across all *mtr* loci (Figure 1e; Supplementary  
141 Table 2).

142 There were multiple recombined mosaic haplotypes present spanning the full-length of  
143 *mtrD* (n=80), *mtrRCD* (n=9), *mtrRCDE* (n=20), and some isolates with partial mosaic *mtrD* with  
144 the majority of the gene homologous to native gonococcal sequence (n=13) (Figure 2). Of the 109  
145 isolates with full-length mosaic *mtrD*, 4 were 99% identical to *N. meningitidis*, 5 had alleles with  
146 94-96% identity to *N. lactamica*, and the remainder had alleles that aligned equally well to *N.*  
147 *meningitidis* and *N. lactamica* with identities ranging from 91-92%. Of the 29 isolates with

148 mosaic promoter regions identified by Grad et al. [7], 24 were 96-98% identical to *N. lactamica*,  
149 4 were 99% identical to *N. meningitidis* with the presence of a 153-bp Correia element insertion  
150 [20], and 1 was 92% similar to *N. meningitidis* but lacked the Correia element that was present in  
151 the other four *N. meningitidis*-like isolates. All isolates with full-length mosaic *mtrD* had  
152 azithromycin MICs  $\geq 0.25$   $\mu\text{g/ml}$ , while all isolates with full-length mosaic *mtrD* and a mosaic  
153 *mtr* promoter had MICs  $\geq 1$   $\mu\text{g/ml}$  (Figure 2).

154 Of the twenty nine *mtr* mosaics described in Grad et al. [7], none had the *mtrC*<sub>120</sub>  
155 substitution, A-deletion, 23s ribosomal rRNA mutation A2059G, mutations in *rplD*, *rplV* tandem  
156 duplications, or variants of the rRNA methylases *ermC* and *ermB* that have been associated with  
157 or experimentally confirmed to be involved in azithromycin resistance [6,7,18,23,28,29,34].  
158 However, four isolates had the premature stop codon mutations in *mtrR*, and five had the C2611T  
159 23s rRNA mutation [5].

160

### 161 **Epistasis between multiple *mtr* loci and within *mtrD***

162 We exploited the natural competence of *Neisseria* to explore the potential for mosaic *mtr*  
163 alleles to produce reduced susceptibility to azithromycin by transforming susceptible strains with  
164 either genomic DNA (gDNA) or PCR-amplified products from mosaic donors. Susceptible  
165 recipient strains for transformations included: 28B1 [20,35,36], GCGS0353, and GCGS0465  
166 (MIC  $\leq 0.125$   $\mu\text{g/ml}$ ; Table 1). Three strains with reported mosaic *mtr* alleles and azithromycin  
167 minimum inhibitory concentrations (MICs)  $\geq 1$   $\mu\text{g/ml}$  were selected as donors for DNA transfer  
168 (Table 1). These isolates included GCGS0276, GCGS0834, and GCGS0402. Of these mosaics,  
169 GCGS0276 had a *N. meningitidis*-like *mtrR* sequence, while GCGS0834 and GCGS0402 had *N.*  
170 *lactamica*-like *mtrRs*. None of the donor strains had premature stop codons in *mtrR* or the  
171 C2611T mutation.

172 Genomic DNA from GCGS0276, GCGS0402, and GCGS0834 transformed multiple  
173 susceptible isolates to resistance (Table 2a). To identify the locus responsible, we sequenced the

174 genomes of 28B1 cell lines transformed with gDNA from mosaic donors and characterized SNPs  
175 that had been inherited from donor strains that were not present in the 28B1 recipient. The only  
176 common region that had been inherited across all transformants was *mtrRCDE* (Supplementary  
177 Figure 2).

178 Genomics results indicated the presence of linkage disequilibrium at *mtrD* and the *mtr*  
179 promoter region (Figure 1 d,f). Thus, to test for possible interaction effects that contribute to  
180 antibiotic-dependent fitness, and to further characterize the mechanism underlying reduced  
181 susceptibility in *mtr* mosaics, we designed targeted amplicons for transformation from *N.*  
182 *meningitidis*-like mosaic (GCGS0276) and a *N. lactamica*-like mosaic (GCGS0402). For  
183 GCGS0276, the only locus within the *mtrRCDE* operon that was found to increase resistance to  
184 azithromycin alone was *mtrD* (Figure 3a; Table 2b). GCGS0276 *mtrD* in the 28B1 background  
185 raised the MIC to azithromycin by 3 fold, from 0.125 to 0.5 µg/ml, yet no single region of *mtrD*  
186 was able to produce the 0.5 µg/ml phenotype (Figure 3b). However, inheriting amplicons that  
187 contained both the 5' (18-356 bp) and 3' (2356-2724 bp) ends of GCGS0276 *mtrD* were together  
188 sufficient to increase the 28B1 MIC to 0.5 µg/ml (Figure 3c-e). There were four changes at the  
189 amino acid level between GCGS0276 and 28B1 in these regions, two in the PN1 domain of MtrD  
190 (I48T and G59D) and two in the PC2 domain (K823D and F854L) (Supplemental Figure 3); and  
191 in total twenty amino acid changes between the GCGS0276 and 28B1 proteins (Supplementary  
192 Figure 3). GCGS0402 *mtrD* alone was not able to produce resistance in 28B1.

193 Transformants that inherited the entire *mtrRCDE* operons of GCGS0276 and GCGS0402  
194 had MICs of 1 and 2 µg/ml respectively, mirroring the donor strain phenotypes. Thus, amplicons  
195 were designed for each of these strains to amplify the *mtrD* locus in combination with other  
196 regions of the operon to determine the combination of loci that would reproduce the donor  
197 resistance phenotypes. For both GCGS0276 and GCGS0402, we found that donor resistance  
198 phenotypes of 1 and 2 µg/ml could be produced in 28B1 by transforming both *mtrD* and the *mtr*  
199 promoter region together (Figure 4; Table 2b; Supplementary Figure 4).



200

## 201 **Regulatory and structural mutations epistatically contribute to resistance**

202 We tested for the contribution of transcript regulatory variation to the mechanism of  
203 resistance by profiling gene expression via RNA-seq of 28B1, 28B1ΔGCGS0276-mtrD, and  
204 28B1ΔGCGS0276-mtrRCDE. As expression of the *mtr* efflux pump is inducible by exposure to  
205 antimicrobial agents [37,38], we evaluated expression pre-azithromycin exposure and 120  
206 minutes after the addition of a sub-MIC dose of azithromycin (0.125 μg/ml) to the culture media.  
207 Across 24 libraries, a total of 106 million 50 bp paired-end reads mapped to the FA1090  
208 reference genome. Each library had on average 4.44±3.49 million mappable reads.

209 We assessed the impact of mosaic *mtrD* on *mtrRCDE* mRNA expression by comparing  
210 28B1ΔGCGS0276-mtrD transformants to 28B1, and found no significant differential regulation of  
211 transcripts encoding *mtr* efflux pump components (Supplementary Figure 5; Supplementary  
212 Table 3). To determine the effect of the mosaic *mtr* promoter on pump expression, we compared  
213 28B1ΔGCGS0276-mtrD and 28B1ΔGCGS0276-mtrRCDE transformants (Figure 5;  
214 Supplementary Table 3). Here, presence of a mosaic *mtr* promoter resulted in the significant  
215 upregulation of *mtrC*, *mtrD*, and *mtrE* across conditions (FDR < 0.0001) and upregulation of  
216 *mtrR* in the absence of azithromycin (FDR=0.003).

217

## 218 **DISCUSSION**

219 Genomic and surveillance efforts from across the globe have demonstrated an association  
220 between mosaic *mtr* alleles and low-level azithromycin resistance [7,17-19], but the causal role of  
221 these alleles in generating resistance has been unclear. Mtr-mediated decreased susceptibility to  
222 macrolides has been attributed exclusively to increased *mtrCDE* expression [27-30]. However, a  
223 majority of *mtr* mosaic isolates in the population genomic dataset have none of the variants that  
224 alter regulation of *mtrCDE*, such as the *mtrC*<sub>120</sub> substitution, A-deletion, or premature stop codon  
225 mutations in *mtrR* [20,27-31].

226 Using a combination of experimental and population genomic approaches, we  
227 demonstrated that the mosaic *mtr* alleles are responsible for resistance and showed that the  
228 mechanism of resistance involves multiple loci, including an epistatic interaction between the  
229 *mtrD* component of the pump and the *mtr* promoter. Population genomics and phylogenetic  
230 reconstruction demonstrated at least twelve independent acquisitions of mosaic *mtr* alleles, which  
231 have introduced multiple rare *mtr* haplotypes from *N. meningitidis* and *N. lactamica* into the  
232 gonococcal population (Figure 1 and 2).

233 Despite the sequence divergence (8%) between *N. meningitidis* and *N. lactamica*-like  
234 mosaics, *mtr* sequences from both generated azithromycin resistance through the same  
235 mechanism. For the *N. meningitidis* mosaic, *mtrD* alone was able to raise the MIC of 28B1 to 0.5  
236 µg/ml independent of transcriptional changes to the pump's regulation; with the donor phenotype  
237 of 1 µg/ml only reproduced by adding the *N. meningitidis mtr* promoter region, which increased  
238 expression of *mtrCDE*. Similarly, although acquisition of the *N. lactamica mtrD* was not  
239 sufficient on its own to enhance resistance, transformation of both the *mtrD* and the *mtr* promoter  
240 region yielded the donor's azithromycin MIC of 2 µg/ml. Thus, the mechanism of resistance in  
241 mosaics is likely derived from both structural changes to *mtrD* coupled with promoter mutations  
242 that result in regulatory changes to *mtrCDE*.

243 The full-length *mtrD* was required for resistance in GCGS0276 transformants, indicating  
244 the role of within-gene epistasis, rather than a single point mutation, in generating azithromycin  
245 resistance. Two regions at the 5' and 3' ends of GCGS0276 *mtrD* together increased the MIC of  
246 28B1 to 0.5 µg/ml (Figure 3). These two regions are part of the central pore of MtrD that  
247 stabilizes the trimeric organization of the protein (PN1) and the outer periplasmic region of the  
248 protein that may interact with MtrC to form a functional pump complex (PC2) [39]. Of note, none  
249 of the mutations observed between 28B1 and GCGS0276 have been shown to contribute to  
250 macrolide resistance in the orthologous proteins AcrB and MexB in other species, nor are they  
251 located in the direct contact site (residue 616) for macrolide recognition (e.g., [40-43]).

252           Within the *mtrCDE* operon, we observed local increases in linkage disequilibrium  
253 coupled with increases of rare mutations (Figure 1). These signatures could be explained by the  
254 recent acquisition of neutral diversity from closely related species, with too little evolutionary  
255 time for the combined effects of recombination and mutation to break down linkage of sites  
256 across imported DNA tracts, or the spread of these mutations to higher frequencies [44,45].  
257 However, our experimental results confirm strong purifying selection on azithromycin plates after  
258 inheritance of partial mosaic haplotypes, suggesting that some of the linkage within *mtrCDE*  
259 observed in natural gonococcal populations may be driven by selection maintaining allelic  
260 combinations that increase resistance to azithromycin.

261           Overall, our results defining the role of mosaic *mtr* in azithromycin resistance affirm the  
262 importance of other *Neisseria* species as an antibiotic resistance reservoir for *N. gonorrhoeae*.  
263 Moreover, whereas mosaic *penA* genes arise from interspecies recombinations within a single  
264 gene and confer cephalosporin resistance through novel structural forms [14,46], our findings of  
265 horizontally acquired epistatically interacting structural and regulatory variants in *mtr* point to  
266 the potential complexity by which antibiotic resistance can arise through the interactions of  
267 multiple loci. Interspecies mosaicism will be an important consideration for future development  
268 of sequence-based molecular resistance diagnostics, as markers designed to amplify gonococcal-  
269 specific sequence will overlook or incorrectly diagnose resistance phenotype. Thus, as the  
270 number of commensal neisserial genome sequences increase, analyses that map the patterns and  
271 extent of interspecies recombination may be a valuable guide in understanding pathways to  
272 resistance and in designing the appropriate diagnostic tools.

273

## 274 **MATERIALS AND METHODS**

### 275 **Genome sequencing and population genomics**

276           Sequencing libraries were prepared using a modification of Illumina's Nextera XP  
277 protocol [47]. Samples were dual-indexed and pooled (n=15 per pool). Paired-end 150 bp

278 sequencing was conducted on an Illumina MiSeq (Illumina Corp., San Diego, C.A.) platform  
279 located at the Harvard T.H. Chan School of Public Health to an average depth of 40x. Previously  
280 sequenced read libraries were obtained from the NCBI's Short Read Archive (Project #  
281 PRJEB2090) and the European Nucleotide Archive (Project #PRJEB2999 and PRJEB7904)  
282 [7,32].

283 To determine the impact of interspecific recombination at *mtrRCDE*, we assessed  
284 patterns of allelic diversity across the *mtrR* transcriptional repressor and the *mtrCDE* pump  
285 compared to the rest of the genome for the 1102 GISP gonococcal isolate [7,32]. Reads were  
286 aligned to the FA1090 reference using Bowtie2 v.2.2.4 [48], and variants were called using pilon  
287 v.1.16 [49]. Vcftools v.0.1.12 [50] was used to merge resultant vcf files and calculate genome-  
288 wide values of  $\pi$  and Tajima's D over 100-bp sliding windows, and  $r^2$  linkage by site. Gubbins  
289 v.2.2.0 [51] was used to predict regions of elevated SNP densities. For each isolate, BLASTn was  
290 used to identify the top hit and highest percent sequence identity for *mtrD* and the *mtr* promoter  
291 to all *Neisseria* within the NCBI database ( $e$ -value  $< 10^{-40}$ ).

292 The extent of exclusive ancestry between *N. gonorrhoeae*, *N. meningitidis*, *N. lactamica*,  
293 and *N. polysaccharea* was assessed using *gsi* [33] for each gene across a 25 kb window  
294 surrounding *mtrRCDE*. In brief, we downloaded *de novo* assemblies and raw sequencing reads  
295 from NCBI for *N. meningitidis* (n=431), *N. lactamica* (n=326), *N. polysaccharea* (n=37), and *N.*  
296 *gonorrhoeae* (n=1102; [7,32]). Raw reads were assembled with SPAdes v.3.7.0 [52], and  
297 assemblies were aligned to the *N. gonorrhoeae* FA1090 reference genome (AE004969.1) using  
298 progressiveMauve ([53]; snapshot 2015-02-13 for linux-x64), since a multi-genome alignment for  
299 all genomes was not computationally tractable. The sequences that were aligned to each gene  
300 within 25 kb of *mtrRCDE* in FA1090 were then extracted with custom Perl scripts and realigned  
301 with MAFFT v.7.309 [54]. This method of pairwise alignments of *de novo* assemblies to the  
302 FA1090 reference identifies orthologs between *N. gonorrhoeae* and the other *Neisseria* using  
303 both sequence identity and microsynteny, which is conserved in the genomic region surrounding

304 *mtrRCDE* (Supplementary Figure 1). We then used RAxML v.8.1.4 [55] to reconstruct the  
305 phylogeny for each gene, using 50 bootstrap replicates and the GTRCAT substitution model.  
306 With these multi-species phylogenies, we calculated *gsi* with the *genealogicalSorting R*  
307 package[33,56].

308

### 309 **Bacterial culture conditions**

310 *N. gonorrhoeae* isolates were provided by the CDC (Table 1). Isolates were cultured on  
311 GCB agar medium supplemented with 1% IsoVitaleX (Becton Dickinson Co., Franklin Lakes,  
312 N.J.). After inoculation, plates were incubated at 37°C in a 5% CO<sub>2</sub> atmosphere incubator for 16-  
313 18 hours. Antimicrobial susceptibility testing was conducted using the agar-dilution method at a  
314 range of azithromycin concentrations from 0 to 16 µg/ml [1]. MICs were recorded after 24 hours  
315 of growth. All isolate stocks were stored at -80°C in trypticase soy broth containing 20%  
316 glycerol.

317

### 318 **Transformation of mosaic *mtr* alleles**

319 Genomic DNA was extracted from isolates by lysing growth from overnight plates in TE  
320 buffer (10 mM Tris pH 8.0, 10 mM EDTA) with 0.5 mg/µl lysozyme and 3 mg/µl proteinase K  
321 (Sigma-Aldrich Corp., St. Louis, M.O.). DNA was purified using the PureLink Genomic DNA  
322 Mini Kit, treated with RNase A (Thermo Fisher Corp., Waltham, M.A.), and stored in water.  
323 Primers were designed to amplify regions of *mtrRCDE*. For primer pairs that did not amplify over  
324 a region containing a DNA uptake sequence, to enhance transformation efficiency the 12-bp AT-  
325 DUS was added to the forward primer (5'-ATGCCGTCTGAA-3') [57]. PCR reactions were  
326 conducted in 50 µl volumes using Phusion High-Fidelity DNA Polymerase (New England  
327 Biolabs Inc., Ipswich, M.A.) using the conditions listed in Supplementary Table 4. Amplified  
328 products were run on a 0.8% agarose gel, excised, and purified with the QIAEX II Gel Extraction  
329 Kit (Qiagen Inc., Valencia, C.A.) to remove gDNA contamination.

330 Transformations were conducted in GCP liquid broth (7.5 g Protease peptone #3, 0.5 g  
331 soluble starch, 2 g dibasic  $K_2HPO_4$ , 0.5 g monobasic  $KH_2PO_4$ , 2.5 g NaCl, ddH<sub>2</sub>O to 500 ml;  
332 Becton Dickinson Co., Franklin Lakes, N.J.) supplemented with 1% IsoVitaleX and 10  $\mu$ M  
333  $MgSO_4$  (Sigma-Aldrich Corp., St. Louis, M.O.). Naturally competent cells were incubated for 10  
334 minutes with gDNA or purified PCR products to allow for DNA uptake and homologous  
335 recombination. Cells were plated on GCB with 1% IsoVitaleX and incubated for 4 hours at 37°C  
336 in a 5% CO<sub>2</sub> atmosphere to allow for expression of novel alleles. Cells on expression plates were  
337 resuspended in tryptic soy broth (Becton Dickinson Co., Franklin Lakes, N.J.) and selected on  
338 0.38-1  $\mu$ g/ml AZI GCB plates containing 1% IsoVitaleX. After 18 hours, single colonies were  
339 picked. Sanger sequencing performed using the GeneWiz sequencing service (GeneWiz Inc.,  
340 Cambridge, M.A.) confirmed successful transformation.

341

#### 342 **Transcriptome construction**

343 Cells harvested from overnight plates were suspended in GCP supplemented with 1%  
344 IsoVitaleX and 0.042% sodium bicarbonate. Cultures were incubated at 37°C for 2 hours to mid-  
345 log phase and then exposed to a sub-lethal dose of AZI (0.125  $\mu$ g/ml). RNA was extracted at 0  
346 minutes (pre-AZI) and 120 minutes (post-AZI) exposure using the Direct-Zol kit (Zymo  
347 Research, Irvine, C.A.). Transcriptome libraries were prepared at the Broad Institute at the  
348 Microbial 'Omics Core using a modified version of the RNAtag-seq protocol [58]. 500 ng of total  
349 RNA was fragmented, depleted of genomic DNA, dephosphorylated, and ligated to DNA  
350 adapters carrying 5'-AN<sub>8</sub>-3' barcodes of known sequence with a 5' phosphate and a 3' blocking  
351 group. Barcoded RNAs were pooled and depleted of rRNA using the RiboZero rRNA depletion  
352 kit (Epicentre, Madison, W.I.). Pools of barcoded RNAs were converted to Illumina cDNA  
353 libraries in 2 main steps: 1) reverse transcription of the RNA using a primer designed to the  
354 constant region of the barcoded adaptor with addition of an adapter to the 3' end of the cDNA by  
355 template switching using SMARTScribe (Clontech, Mountain View, C.A.) as described [59]; 2)

356 PCR amplification using primers whose 5' ends target the constant regions of the 3' or 5'  
357 adaptors and whose 3' ends contain the full Illumina P5 or P7 sequences. cDNA libraries were  
358 sequenced on the Illumina Nextseq 500 platform to generate 50-bp paired end reads.

359 Barcode sequences were removed, and reads were aligned to the FA1090 reference  
360 genome. Reads counts were assigned to genes and other genomic features using custom scripts.  
361 For the FA1090 we mapped reads to either the sense or anti-sense strand for coding domain  
362 sequences (CDSs, n=1894), tRNAs (n=55), and rRNAs (n=12). For intergenic regions (IGRs,  
363 n=1722), we mapped to each antiparallel strand. Differential expression analysis was conducted  
364 in DESeq2 v.1.10.1 [60].

365

## 366 **ACKNOWLEDGEMENTS**

367 We thank David Trees and Steve Johnson for training on gonococcal transformation design and  
368 Jonathan Livny for his technical assistance with transcriptome library preparation.

369

## 370 **FINANCIAL SUPPORT**

371 This work was supported by the Smith Family Foundation and NIH R01 AI132606.

372

## 373 **POTENTIAL CONFLICTS OF INTEREST**

374 All authors: No reported conflicts.

375

## 376 **REFERENCES**

- 377 1. Centers for Disease Control. Gonococcal Isolate Surveillance Project (GISP). Accessed 24  
378 April 2018. Available: <http://www.cdc.gov/std/gisp/>
- 379 2. Public Health England. Surveillance of antimicrobial resistance in *Neisseria gonorrhoeae*  
380 in England and Wales: Key findings from the Gonococcal Resistance to Antimicrobials

- 381           Surveillance Programme (GRASP). Antimicrobial resistance in *Neisseria gonorrhoeae*:  
382           Data to June 2017. 2017 pp. 1-24. Available:  
383           [http://www.gov.uk/government/publications/gonococcal-resistance-to-antimicrobials-](http://www.gov.uk/government/publications/gonococcal-resistance-to-antimicrobials-surveillance-programme-grasp-report)  
384           surveillance-programme-grasp-report  
385
- 386    3.       European Centre for Disease Prevention and Control. Gonococcal antimicrobial  
387           susceptibility surveillance in Europe. ECDC Surveillance Report. 2015 pp. 1–44.  
388           Available: <http://www.ecdc.europa.eu>
- 389    4.       The World Health Organization. Gonococcal antimicrobial resistance in the Western  
390           Pacific Region. WHO Report. 2017 Sept pp. 1-4. Available:  
391           <http://www.wpro.who.int/hiv/topics/gasp/>
- 392    5.       Ng LK, Martin I, Liu G, Bryden L. Mutation in 23S rRNA associated with macrolide  
393           resistance in *Neisseria gonorrhoeae*. Antimicrob Agents Ch. 2002;46: 3020–3025.
- 394    6.       Chisholm SA, Dave J, Ison CA. High-level azithromycin resistance occurs in *Neisseria*  
395           *gonorrhoeae* as a result of a single point mutation in the 23S rRNA genes. Antimicrob  
396           Agents Ch. 2010;54: 3812–3816.
- 397    7.       Grad YH, Harris SR, Kirkcaldy RD, Green AG, Marks DS, Bentley SD, et al. Genomic  
398           epidemiology of gonococcal resistance to extended-spectrum cephalosporins, macrolides,  
399           and fluoroquinolones in the United States, 2000–2013. J Infect Dis. 2016;214: 1579–1587.
- 400    8.       Smith JM, Smith NH, O'Rourke M, Spratt BG. How clonal are bacteria? P Natl A Sci;  
401           1993;90: 4384–4388.
- 402    9.       O'Rourke M, Stevens E. Genetic structure of *Neisseria gonorrhoeae* populations: A non-  
403           clonal pathogen. J Gen Microbiol. 1993;139: 2603–2611.



- 404 10. O'Rourke M, Spratt BG. Further evidence for the non-clonal population structure of  
405 *Neisseria gonorrhoeae*: Extensive genetic diversity within isolates of the same  
406 electrophoretic type. *Microbiol.* 1994;140: 1285–1290.
- 407 11. Corander J, Connor TR, O'Dwyer CA, Kroll JS, Hanage WP. Population structure in the  
408 *Neisseria*, and the biological significance of fuzzy species. *J Roy Soc Interface.* 2011;9:  
409 1208–1215.
- 410 12. Fussenegger M, Rudel T, Barten R, Ryll R, Meyer TF. Transformation competence and  
411 type-4 pilus biogenesis in *Neisseria gonorrhoeae* – A review. *Gene.* 1997;192: 125–134.
- 412 13. Halter R, Pohlner J, Meyer TF. Mosaic-like organization of *IgA* protease genes in  
413 *Neisseria gonorrhoeae* generated by horizontal genetic exchange in vivo. *EMBO J.*  
414 1989;8: 2737–2744.
- 415 14. Spratt BG, Bowler LD, Zhang QY, Zhou J, Smith JM. Role of interspecies transfer of  
416 chromosomal genes in the evolution of penicillin resistance in pathogenic and commensal  
417 *Neisseria* species. *J Mol Evol.* 1992;34: 115–125.
- 418 15. Feavers IM, Heath AB, Bygraves JA, Maiden MC. Role of horizontal genetic exchange in  
419 the antigenic variation of the class 1 outer membrane protein of *Neisseria meningitidis*.  
420 *Mol Microbiol.* 1992;6: 489–495.
- 421 16. Zhou J, Spratt BG. Sequence diversity within the *argF*, *fbp* and *recA* genes of natural  
422 isolates of *Neisseria meningitidis*: Interspecies recombination within the *argF* gene. *Mol*  
423 *Microbiol.* 1992;6: 2135–2146.
- 424 17. Trembizki E, Doyle C, Jennison A, Smith H, Bates J, Lahra M, et al. A *Neisseria*  
425 *gonorrhoeae* strain with a meningococcal *mtrR* sequence. *J Med Microbiol.* 2014;63:

- 426 1113–1115.
- 427 18. Demczuk W, Martin I, Peterson S, Bharat A, Van Domselaar G, Graham M, et al.  
428 Genomic epidemiology and molecular resistance mechanisms of azithromycin-resistant  
429 *Neisseria gonorrhoeae* in Canada from 1997 to 2014. J Clin Microbiol. 2016;54: 1304–  
430 1313.
- 431 19. Whiley DM, Kundu RL, Jennison AV, Buckley C, Limnios A, Hogan T, et al.  
432 Azithromycin-resistant *Neisseria gonorrhoeae* spreading amongst men who have sex with  
433 men (MSM) and heterosexuals in New South Wales, Australia, 2017. J Antimicrob  
434 Chemoth. 2018;17: 148–5.
- 435 20. Johnson S. Mutations causing in vitro resistance to azithromycin in *Neisseria*  
436 *gonorrhoeae*. Int J Antimicrob Ag. 2003;21: 414–419.
- 437 21. McLean CA, Wang SA, Hoff GL, Dennis LY, Trees DL, Knapp JS, et al. The emergence  
438 of *Neisseria gonorrhoeae* with decreased susceptibility to azithromycin in Kansas City,  
439 Missouri, 1999 to 2000. Sex Transm Dis. 2004;31: 73–78.
- 440 22. Pan W, Spratt BG. Regulation of the permeability of the gonococcal cell envelope by the  
441 *mtr* system. Mol Microbiol. 1994;11: 769–775.
- 442 23. Hagman KE, Shafer WM. Transcriptional control of the *mtr* efflux system of *Neisseria*  
443 *gonorrhoeae*. J Bacteriol. 1995;177: 4162–4165.
- 444 24. Delahay RM, Robertson BD, Balthazar JT, Shafer WM, Ison CA. Involvement of the  
445 gonococcal MtrE protein in the resistance of *Neisseria gonorrhoeae* to toxic hydrophobic  
446 agents. Microbiol. 1997;143: 2127–2133.
- 447 25. Lucas CE, Balthazar JT, Hagman KE, Shafer WM. The MtrR repressor binds the DNA

- 448 sequence between the *mtrR* and *mtrC* genes of *Neisseria gonorrhoeae*. J Bacteriol.  
449 1997;179: 4123–4128.
- 450 26. Hagman KE, Lucas CE, Balthazar JT, Snyder L, Nilles M, Judd RC, et al. The MtrD  
451 protein of *Neisseria gonorrhoeae* is a member of the resistance/nodulation/division  
452 protein family constituting part of an efflux system. Microbiol. 1997;143: 2117–2125.
- 453 27. Warner DM, Shafer WM, Jerse AE. Clinically relevant mutations that cause derepression  
454 of the *Neisseria gonorrhoeae* MtrC-MtrD-MtrE Efflux pump system confer different  
455 levels of antimicrobial resistance and *in vivo* fitness. Mol Microbiol. 2008;70: 462–478.
- 456 28. Ohneck EA, Zalucki YM, Johnson PJT, Dhulipala V, Golparian D, Unemo M, et al. A  
457 novel mechanism of high-level, broad-spectrum antibiotic resistance caused by a single  
458 base pair change in *Neisseria gonorrhoeae*. mBio. 2011;2: e00187–11.
- 459 29. Hagman KE, Pan W, Spratt BG, Balthazar JT, Judd RC, Shafer WM. Resistance of  
460 *Neisseria gonorrhoeae* to antimicrobial hydrophobic agents is modulated by the *mtrRCDE*  
461 efflux system. Microbiol. 1995;141: 611–622.
- 462 30. Shafer WM, Balthazar JT, Hagman KE, Morse SA. Missense mutations that alter the  
463 DNA-binding domain of the MtrR protein occur frequently in rectal isolates of *Neisseria*  
464 *gonorrhoeae* that are resistant to faecal lipids. Microbiol. 1995;141: 907–911.
- 465 31. Zarantonelli L, Borthagaray G, Lee EH, Veal W, Shafer WM. Decreased susceptibility to  
466 azithromycin and erythromycin mediated by a novel *mtr(R)* promoter mutation in  
467 *Neisseria gonorrhoeae*. J Antimicrob Chemoth. 2001;47: 651–654.
- 468 32. Grad YH, Kirkcaldy RD, Trees D, Dordel JD, Harris SR, Goldstein E, et al. Genomic  
469 epidemiology of *Neisseria gonorrhoeae* with reduced susceptibility to cefixime in the

- 470 USA: A retrospective observational study. *Lancet Infect Dis.* 2014;14: 220–226.
- 471 33. Cummings MP, Neel MC, Shaw KL. A genealogical approach to quantifying lineage  
472 divergence. *Evol.* 2008;62: 2411–2422.
- 473 34. Roberts MC, Chung WO, Roe D, Xia M, Marquez C, Borthagaray G, et al. Erythromycin-  
474 resistant *Neisseria gonorrhoeae* and oral commensal *Neisseria spp.* carry known rRNA  
475 methylase genes. *Antimicrob Agents Ch.* 1999;43: 1367–1372.
- 476 35. Morse SA, Johnson SR, Biddle JW, Roberts MC. High-level tetracycline resistance in  
477 *Neisseria gonorrhoeae* is result of acquisition of streptococcal *tetM* determinant.  
478 *Antimicrob Agents Ch.* 1986;30: 664–670.
- 479 36. Johnson SR, Grad Y, Ganakammal SR, Burroughs M, Frace M, Lipsitch M, et al. *In vitro*  
480 selection of *Neisseria gonorrhoeae* mutants with elevated MIC values and increased  
481 resistance to cephalosporins. *Antimicrob Agents Ch.* 2014;58: 6986–6989.
- 482 37. Rouquette C, Harmon JB, Shafer WM. Induction of the *mtrCDE*-encoded efflux pump  
483 system of *Neisseria gonorrhoeae* requires MtrA, an AraC-like protein. *Mol Microbiol.*  
484 1999;33: 651–658.
- 485 38. Zalucki YM, Dhulipala V, Shafer WM. Dueling regulatory properties of a transcriptional  
486 activator (MtrA) and repressor (MtrR) that control efflux pump gene expression in  
487 *Neisseria gonorrhoeae*. *mBio.* 2012;3: e00446–12.
- 488 39. Bolla JR, Su C-C, Do SV, Radhakrishnan A, Kumar N, Long F, et al. Crystal structure of  
489 the *Neisseria gonorrhoeae* MtrD inner membrane multidrug efflux pump. *PLoS One.*  
490 2014;9: e97903–8.

- 491 40. Wehmeier C, Schuster S, Fahrnich E, Kern WV, Bohnert JA. Site-directed mutagenesis  
492 reveals amino acid residues in the *Escherichia coli* RND efflux pump AcrB that confer  
493 macrolide resistance. *Antimicrob Agents Ch.* 2008;53: 329–330.
- 494 41. Eicher T, Cha H-J, Seeger MA, Brandstatter L, El-Delik J, Bohnert JA, et al. Transport of  
495 drugs by the multidrug transporter AcrB involves an access and a deep binding pocket that  
496 are separated by a switch-loop. *P Natl Acad Sci.* 2012;109: 5687–5692.
- 497 42. Cha HJ, Muller RT, Pos KM. Switch-loop flexibility affects transport of large drugs by the  
498 promiscuous AcrB multidrug efflux transporter. *Antimicrob Agents Ch.* 2014;58: 4767–  
499 4772.
- 500 43. Ababou A, Koronakis V. Structures of gate loop variants of the AcrB drug efflux pump  
501 bound by erythromycin substrate. *PLoS One.* 2016;11: e0159154–8.
- 502 44. Gogarten JP, Townsend JP. Horizontal gene transfer, genome innovation and evolution.  
503 *Nat Rev Microbiol.* 2005;3: 679–687.
- 504 45. Theunert C, Slatkin M. Distinguishing recent admixture from ancestral population  
505 structure. *Genome Biol Evol.* 2017;9: 427–437.
- 506 46. Tomberg J, Unemo M, Davies C, Nicholas RA. Molecular and structural analysis of  
507 mosaic variants of penicillin-binding protein 2 conferring decreased susceptibility to  
508 expanded-spectrum cephalosporins in *Neisseria gonorrhoeae*: Role of epistatic mutations.  
509 *Biochemistry.* 2010;49: 8062–8070.
- 510 47. Baym M, Kryazhimskiy S, Lieberman TD, Chung H, Desai MM, Kishony R. Inexpensive  
511 multiplexed library preparation for megabase-sized genomes. *PLoS One.* 2015;10:  
512 e0128036–15.

- 513 48. Langmead B, Salzberg SL. Fast gapped-read alignment with Bowtie 2. *Nat Meth.* 2012;9:  
514 357–359.
- 515 49. Walker BJ, Abeel T, Shea T, Priest M, Abouelliel A, Sakthikumar S, et al. Pilon: An  
516 integrated tool for comprehensive microbial variant detection and genome assembly  
517 improvement. *PLOS One.* 2014;9: e112963–14.
- 518 50. Danecek P, Auton A, Abecasis G, Albers CA, Banks E, DePristo MA, et al. The variant  
519 call format and VCFtools. *Bioinformatics.* 2011;27: 2156–2158.
- 520 51. Croucher NJ, Page AJ, Connor TR, Delaney AJ, Keane JA, Bentley SD, et al. Rapid  
521 phylogenetic analysis of large samples of recombinant bacterial whole genome sequences  
522 using Gubbins. *Nucleic Acids Res.* 2015;43: e15–e15.
- 523 52. Bankevich A, Nurk S, Antipov D, Gurevich AA, Dvorkin M, Kulikov AS, et al. SPAdes:  
524 A new genome assembly algorithm and its applications to single-cell sequencing. *J*  
525 *Comput Biol.* 2012;19: 455–477.
- 526 53. Darling AE, Mau B, Perna NT. progressiveMauve: Multiple genome alignment with gene  
527 gain, loss and rearrangement. *PLoS One.* 2010;5: e11147–17.
- 528 54. Katoh K, Misawa K, Kuma K-I, Miyata T. MAFFT: A novel method for rapid multiple  
529 sequence alignment based on fast Fourier transform. *Nucleic Acids Res.* 2002;30: 3059–  
530 3066.
- 531 55. Stamatakis A. RAxML version 8: A tool for phylogenetic analysis and post-analysis of  
532 large phylogenies. *Bioinformatics.* 2014;30: 1312–1313.
- 533 56. Team RC. R: A language and environment for statistical computing. R Foundation for  
534 Statistical Computing, Vienna, Austria.

- 535 57. Ambur OH, Frye SA, Tønjum T. New functional identity for the DNA uptake sequence in  
536 transformation and its presence in transcriptional terminators. *J Bacteriol.* 2007;189:  
537 2077–2085.
- 538 58. Shishkin AA, Giannoukos G, Kucukural A, Ciulla D, Busby M, Surka C, et al.  
539 Simultaneous generation of many RNA-seq libraries in a single reaction. *Nat Meth.*  
540 2015;12: 323–325.
- 541 59. Zhu YY, Machleder EM, Chenchik A, Li R, Siebert PD. Reverse transcriptase template  
542 switching: A SMART approach for full-length cDNA library construction.  
543 *BioTechniques.* 2001;30: 892–897.
- 544 60. Love MI, Huber W, Anders S. Moderated estimation of fold change and dispersion for  
545 RNA-seq data with DESeq2. *Genome Biol.* 2014;15: 21–31.
- 546 61. Seemann, T. Prokka: Rapid prokaryotic genome annotation. *Bioinformatics* 2014;30:  
547 2068-2069.

548 **TABLES AND FIGURES**

**Table 1. Properties of strains used in the study**

| Strain   | Source                                                | AZI <sup>a</sup> MIC (µg/ml)* |
|----------|-------------------------------------------------------|-------------------------------|
| GCGS0276 | GISP <sup>b</sup> isolate, Kansas City                | 1                             |
| GCGS0402 | GISP <sup>b</sup> isolate, Miami                      | 2                             |
| GCGS0834 | GISP <sup>b</sup> isolate, Los Angeles                | 2                             |
| GCGS0353 | GISP <sup>b</sup> isolate, Dallas                     | 0.03                          |
| GCGS0465 | GISP <sup>b</sup> isolate, Phoenix                    | 0.06                          |
| 28B1     | Disseminated gonococcal infection isolate (CDC, 1974) | 0.125                         |

*a* AZI, azithromycin

*b* GISP, *Gonococcal Isolate Surveillance Project*

\*MIC scores are the average of three independent replicate tests.

549

550

**Table 2. MIC values of transformant strains**

| Strain                                             | Recipient | Transformation Substrate                                                | AZI MIC (µg/ml)* | mosaic <i>mirD</i> | mosaic <i>mirP</i> |
|----------------------------------------------------|-----------|-------------------------------------------------------------------------|------------------|--------------------|--------------------|
| <b>2a. Genomic DNA (gDNA) Transformant Strains</b> |           |                                                                         |                  |                    |                    |
| <i>N. meningitidis</i> -like <i>mirRCDE</i>        |           |                                                                         |                  |                    |                    |
| 28BIΔGCGS0276-gDNA                                 | 28BI      | GCGS0276 gDNA                                                           | 2                | +                  | +                  |
| GCGS0353ΔGCGS0276-gDNA                             | GCGS0353  | GCGS0276 gDNA                                                           | 1                | +                  | +                  |
| GCGS0465ΔGCGS0276-gDNA                             | GCGS0465  | GCGS0276 gDNA                                                           | 2                | +                  | +                  |
| <i>N. lactamica</i> -like <i>mirRCDE</i>           |           |                                                                         |                  |                    |                    |
| 28BIΔGCGS0402-gDNA                                 | 28BI      | GCGS0402 gDNA                                                           | 2                | +                  | +                  |
| GCGS0353ΔGCGS0402-gDNA                             | GCGS0353  | GCGS0402 gDNA                                                           | 2                | +                  | +                  |
| GCGS0465ΔGCGS0402-gDNA                             | GCGS0465  | GCGS0402 gDNA                                                           | 2                | +                  | +                  |
| 28BIΔGCGS0834-gDNA                                 | 28BI      | GCGS0834 gDNA                                                           | 2                | +                  | +                  |
| GCGS0353ΔGCGS0834-gDNA                             | GCGS0353  | GCGS0834 gDNA                                                           | 2                | +                  | +                  |
| GCGS0465ΔGCGS0834-gDNA                             | GCGS0465  | GCGS0834 gDNA                                                           | 2                | +                  | +                  |
| <b>2b. PCR Product Transformant Strains</b>        |           |                                                                         |                  |                    |                    |
| 28BIΔGCGS0276-mirRCDE                              | 28BI      | GCGS0276 <i>mirRCDE</i>                                                 | 1                | +                  | +                  |
| 28BIΔGCGS0276-mirD                                 | 28BI      | GCGS0276 partial <i>mirC</i> (1185-1241 bp) and <i>mirD</i> (1-3174 bp) | 0.5              | +                  | -                  |
| 28BIΔGCGS0276-mirD/18-3174                         | 28BI      | GCGS0276 partial <i>mirD</i> (18-3174 bp)                               | 0.5              | +                  | -                  |
| 28BIΔGCGS0276-mirD/+262-2724                       | 28BI      | GCGS0276 partial <i>mirC</i> (1185-1241 bp) and <i>mirD</i> (1-2724 bp) | 0.5              | +                  | -                  |
| 28BIΔGCGS0276-mirDp                                | 28BI      | GCGS0276 mirD + promoter                                                | 1                | +                  | +                  |
| 28BIΔGCGS0402-mirRCDE                              | 28BI      | GCGS0402 <i>mirRCDE</i>                                                 | 2                | +                  | +                  |
| 28BIΔGCGS0402-mirDp                                | 28BI      | GCGS0402 mirD + promoter                                                | 2                | +                  | +                  |

\*MIC scores are the average of three independent replicate tests.



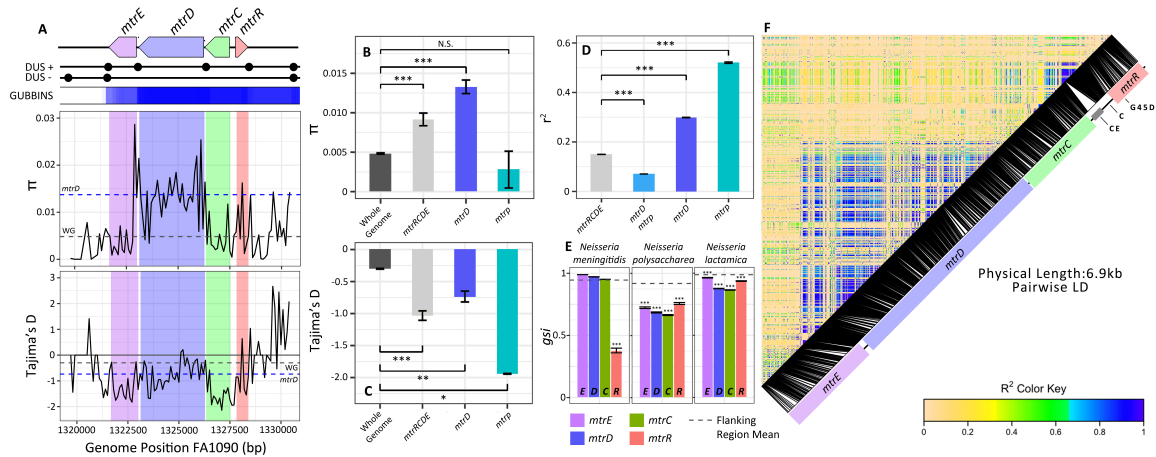

551  
 552 **Figure 1. Horizontal gene transfer (HGT) of *mtr* introduces novel adaptive genetic variation**  
 553 **into *Neisseria gonorrhoeae*.** (A-C) The U.S. gonococcal population (n=1102 isolates) shows  
 554 patterns of elevated allelic diversity across *mtrRCDE*, with the highest diversity at *mtrD*,  
 555 compared to the rest of the genome. An excess of rare alleles across *mtrRCDE* (Tajima's D<0)  
 556 suggests the introduction of new genetic variation in this region has occurred recently, possibly  
 557 after a genome-wide selective sweep or population contraction. (E) Depressed *gsi* values indicate  
 558 importation of divergent alleles from multiple neisserial species into gonococcus across all *mtr*  
 559 loci. (D,F) The strongest linkage was observed within *mtrD* and the *mtr* promoter regions.  
 560

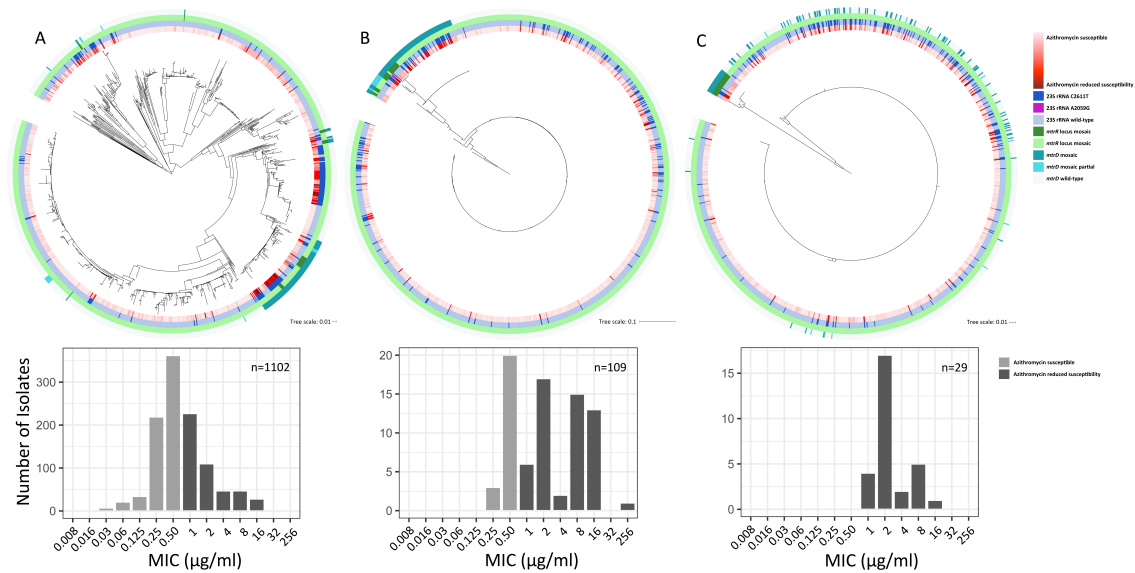

561  
562 **Figure 2. Divergent *mtrD* and *mtr* promoter haplotypes are associated with step-wise**  
563 **increases in MIC to azithromycin.** (A) A maximum likelihood whole-genome-sequence  
564 phylogeny of 1102 *Neisseria gonorrhoeae* isolates, based on single-nucleotide polymorphisms  
565 generated from mapping to the FA1090 reference genome (Grad et al. 2016), is associated with a  
566 distribution of MIC values which fall both above and below the defined resistance threshold  
567 (MIC  $\geq$  1  $\mu$ g/ml). The inner annotation ring shows MICs to azithromycin on a continuous scale,  
568 the following annotation ring indicates isolates with at least 2 copies of the C2611T 23S  
569 ribosomal RNA (rRNA) mutation or isolates with 4 copies of the A2059G 23S rRNA mutation,  
570 the next annotation ring shows isolates that were identified as interspecies mosaics based on their  
571 sequence at *mtrR* by Grad et al. (2016), and the outermost annotation ring shows isolates  
572 identified as *mtrD* mosaics in this study. (B) A maximum likelihood phylogeny built on *mtrD*  
573 alignments show 109 isolates with full-length mosaic alleles at this locus associated with elevated  
574 MICs to azithromycin. (C) A maximum likelihood phylogeny built on the *mtr* promoter region  
575 identifies all 29 mosaics with reduced susceptibility to azithromycin identified by Grad et al. [7]  
576 also have inherited mosaic *mtrD*.

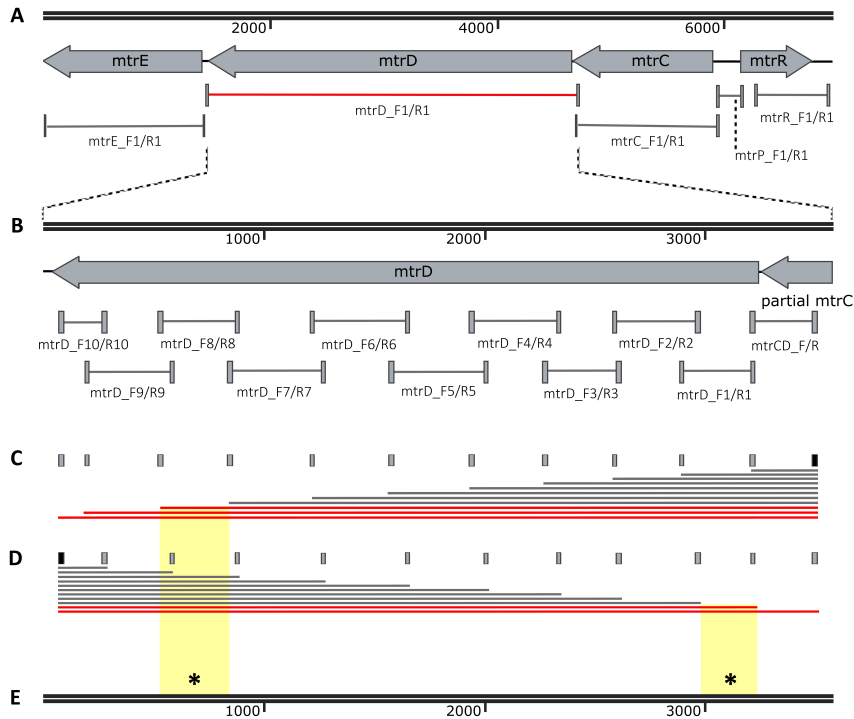

577

578 **Figure 3. Epistatic interactions between multiple domains of *mtrD* contribute to elevated**

579 **MICs.** (A) GCGS0276 *mtrD* in the 28B1 background elevated MIC from 0.125  $\mu\text{g/ml}$  to 0.5

580  $\mu\text{g/ml}$  (red). (B) Primer pairs designed to amplify  $\sim 300$  bp fragments over the length of *mtrD*

581 resulted in no observed transformants on 0.38  $\mu\text{g/ml}$  selection plates, suggesting multiple

582 mutations across *mtrD* are needed for resistance. To determine the regions that contributed to

583 resistance, multiple fragment sizes were constructed by (C) holding the rightmost forward primer

584 (black) constant while adding different reverse primers (grey), and (D) holding the leftmost

585 reverse primer (black) constant while adding forward primers (grey) to separate reactions. (E) At

586 minimum SNPs at base pair positions 18 to 356 coupled with SNPs at positions 2356 to 2724 (\*)

587 were needed to raise the MIC from the 0.125  $\mu\text{g/ml}$  of the recipient 28B1 strain to 0.5  $\mu\text{g/ml}$ .

588

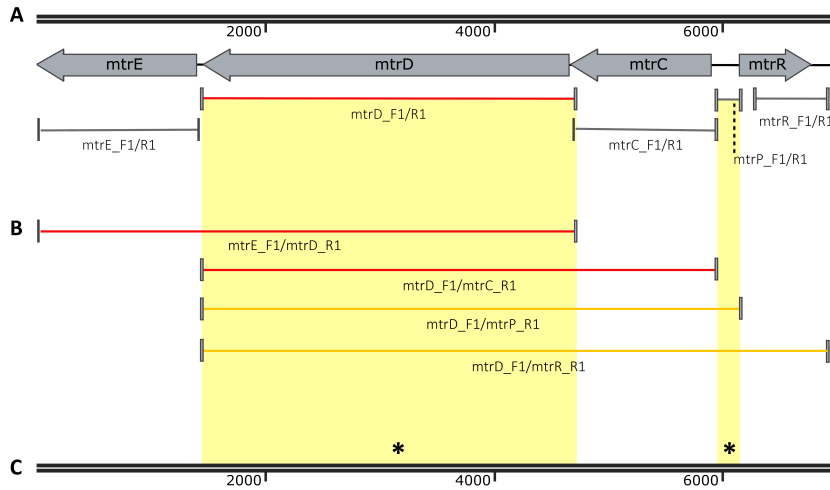

589

590 **Figure 4. Epistasis between *mtrD* and the *mtr* promoter region is causal to reduced**  
591 **susceptibility.** (A) GCGS0276 *mtrD* was the only region that could independently raise MIC  
592 from 0.125 to 0.5  $\mu\text{g/ml}$  in the 28B1 background (red). (B) Only the addition of the *mtr* promoter  
593 raised MIC to the donor strain phenotype of 1  $\mu\text{g/ml}$  (yellow lines).

594

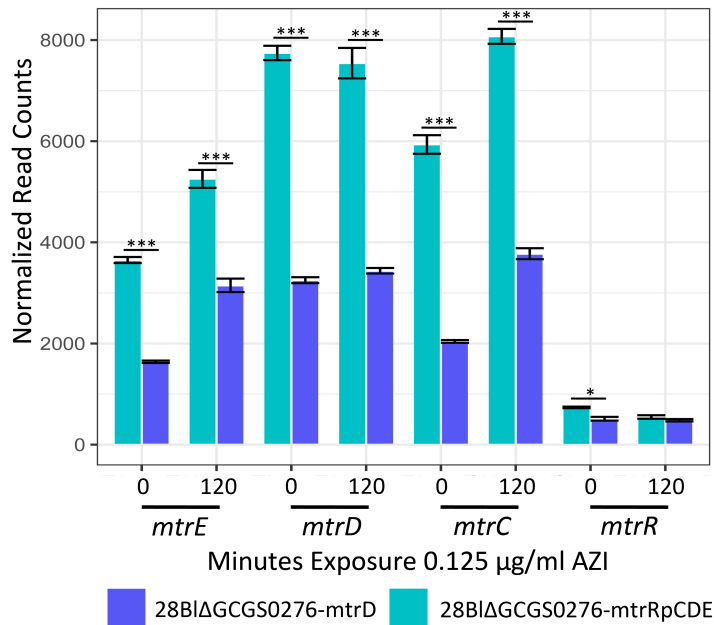

595

596 **Figure 5. The *N. meningitidis*-like GCGS0276 mosaic *mtr* promoter sequence upregulates**

597 **expression of *mtr* efflux pump component mRNAs.** 28Bl transformants with mosaic

598 GCGS0276 *mtrD* (blue) or mosaic GCGS0276 *mtrRCDE* (teal) were exposed to sub-MIC (0.125

599 μg/ml) concentrations of azithromycin for 120 minutes. In both the presence and absence of drug,

600 the presence of the *mtr* promoter region results in significantly upregulated pump component

601 mRNAs (FDR < 0.0001).

602
